# Supplementary material
Source: Springer Nature journal article supplement (https://www.springermedizin.de/resource/supplementary/12992_2011_126_MOESM4_ESM.pdf/9616510)

Index

1,400

1,200

1,000

800

600

400

200

**GUL: Government Use License**

1<sup>st</sup> GUL

2<sup>nd</sup> GUL

US GSP  
withdrawal

3<sup>rd</sup> GUL

Month - Year

Jan - 06  
Feb - 06  
Mar - 06  
Apr - 06  
May - 06  
Jun - 06  
Jul - 06  
Aug - 06  
Sep - 06  
Oct - 06  
Nov - 06  
Dec - 06  
Jan - 07  
Feb - 07  
Mar - 07  
Apr - 07  
May - 07  
Jun - 07  
Jul - 07  
Aug - 07  
Sep - 07  
Oct - 07  
Nov - 07  
Dec - 07  
Jan - 08  
Feb - 08  
Mar - 08  
Apr - 08  
May - 08  
Jun - 08  
Jul - 08  
Aug - 08

**Source: Stock Exchange of Thailand**

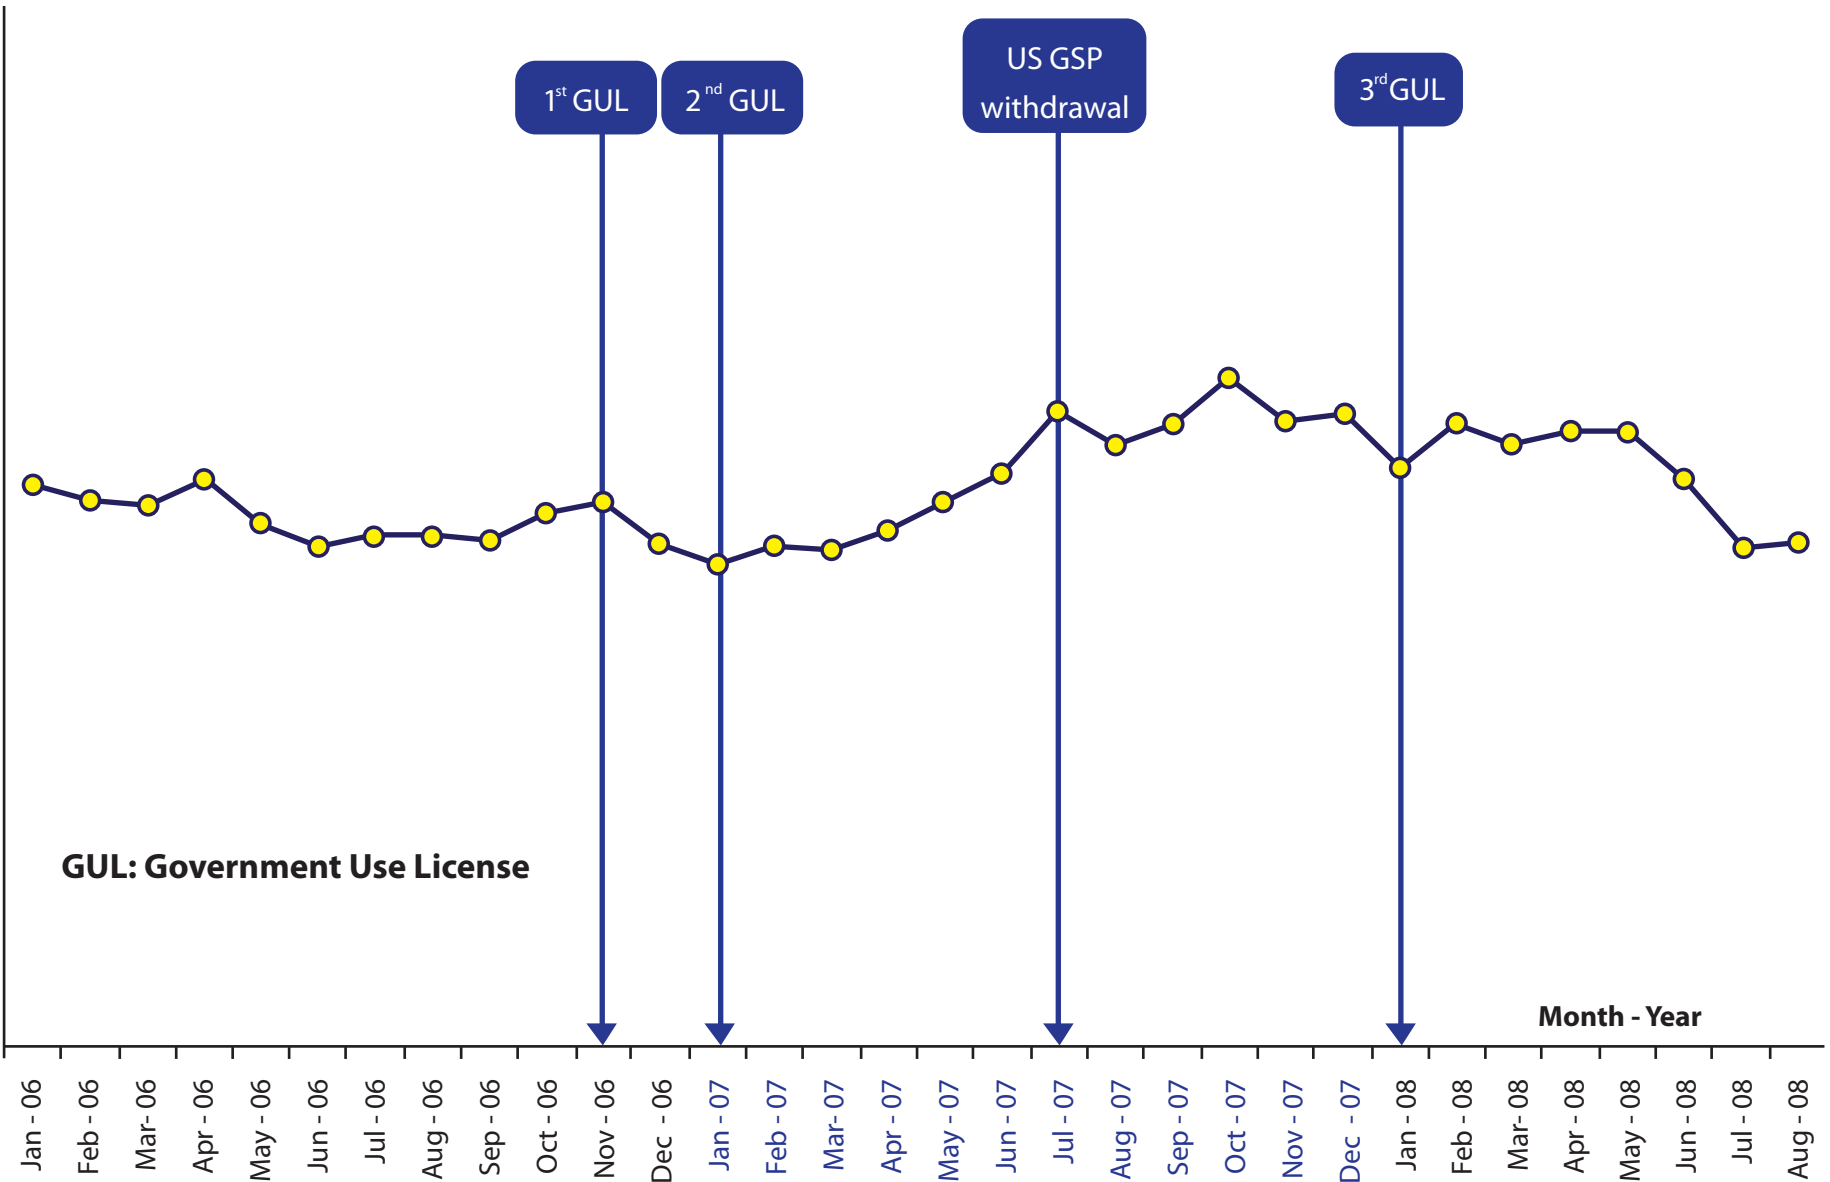

Supplement: MOESM4 [file 9616510]
